# Supplementary material for: Sex-specific role of myostatin signaling in neonatal muscle growth, denervation atrophy, and neuromuscular contractures
Source: eLife journal article supplement (doi:10.7554/elife.81121), 2022-10-31
Supplement: supp [file Figure 5-source data 2 legend.docx]

**Figure 5A – GAPDH:** This file contains the full raw unedited gel scanned to Image StudioTM Lite as well as the uncropped gel saved as a JPG file.
